# Supplementary material for: Low-temperature heat capacities of 1-alkyl-3-methylimidazolium bis(oxalato)borate ionic liquids and the influence of anion structural characteristics on thermodynamic properties
Source: Royal Society of Chemistry journal article supplement (doi:10.1039/c0cp01744b), 2010-11-23
Supplement: c0cp01744b.pdf [file c0cp01744b.pdf]

# **Low-temperature heat capacities of 1-alkyl-3-methylimidazolium bis(oxalato)borate ionic liquids and the influence of anion structural characteristics on thermodynamic properties**

Miao Yang,<sup>†</sup> Zhao-Jun Ning,<sup>‡</sup> Qing-Shan Liu,<sup>†</sup> Li-Xian Sun,<sup>‡</sup> Pei-Fang Yan,<sup>†</sup> Zhi-Cheng Tan,<sup>\* †‡</sup>

Urs Welz-Biermann<sup>\* †</sup>

<sup>†</sup>*China Ionic Liquid Laboratory and* <sup>‡</sup>*Thermochemistry Laboratory, Dalian Institute of Chemical  
Physics, Chinese Academy of Sciences, Dalian 116023, China*

\*Corresponding authors: E-mail: [tzc@dicp.ac.cn](mailto:tzc@dicp.ac.cn) (Zhi-Cheng Tan);

[uwb@dicp.ac.cn](mailto:uwb@dicp.ac.cn) (Urs Welz-Biermann)

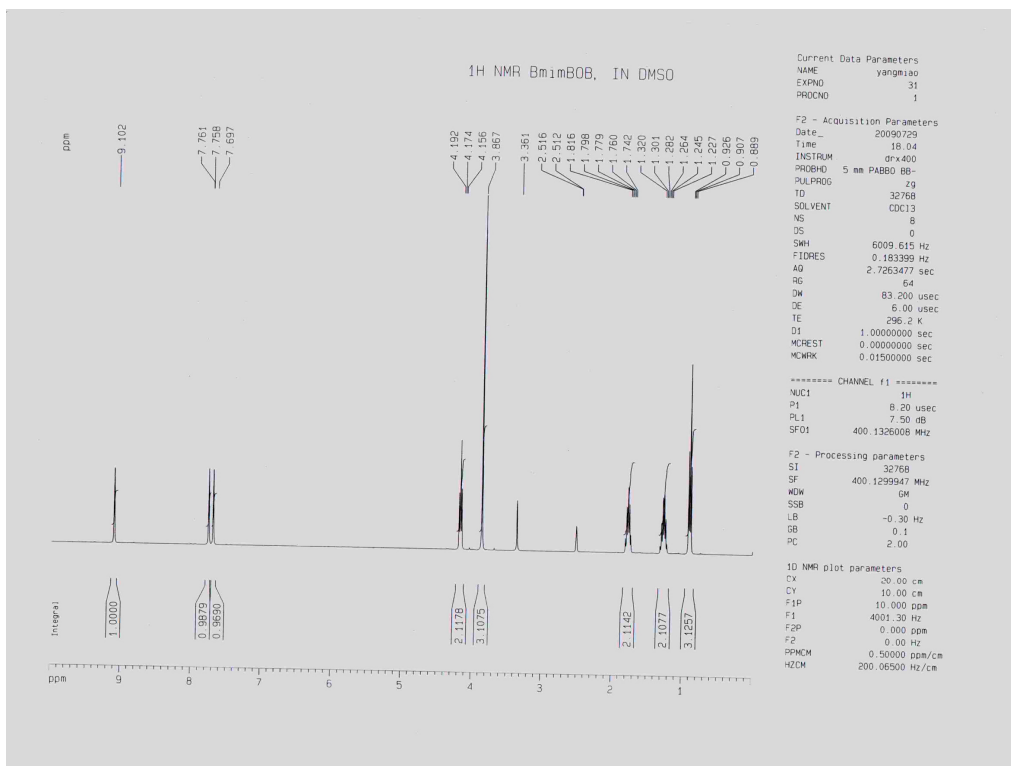

Fig. S1 <sup>1</sup>H NMR of [Bmim][BOB]

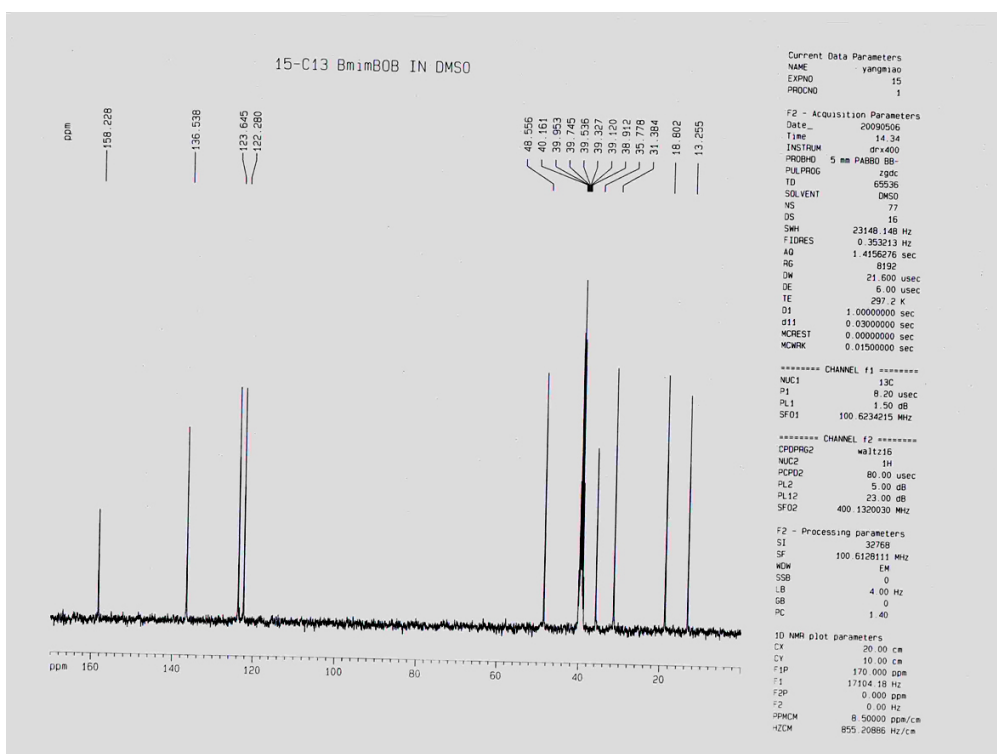

Fig. S2 <sup>13</sup>C NMR of [Bmim][BOB]

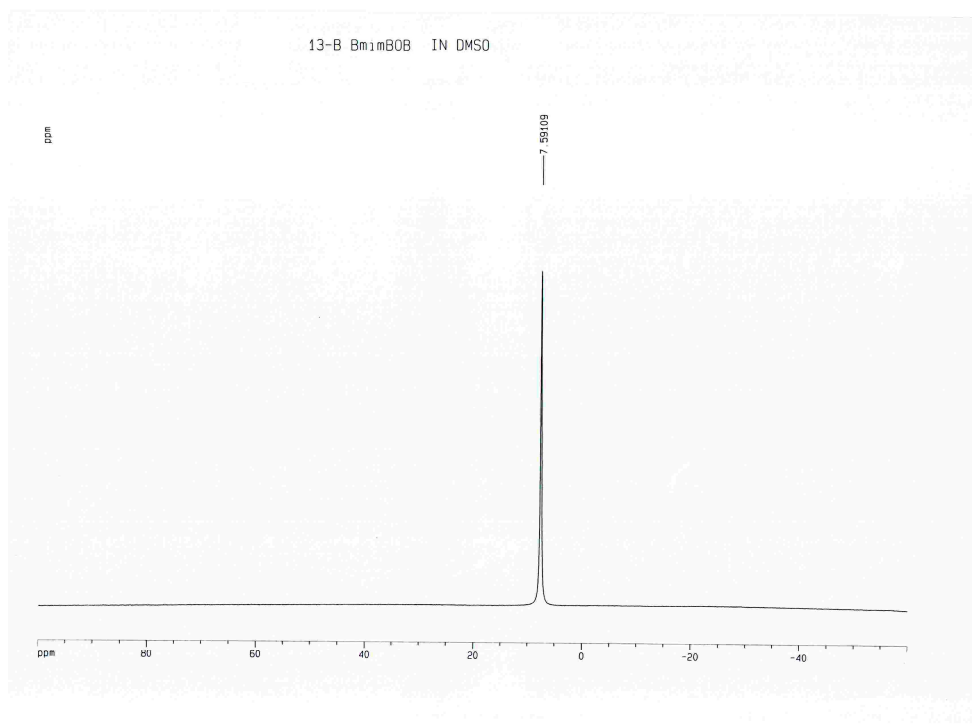

Fig. S3  $^{13}\text{B}$  NMR of [Bmim][BOB]

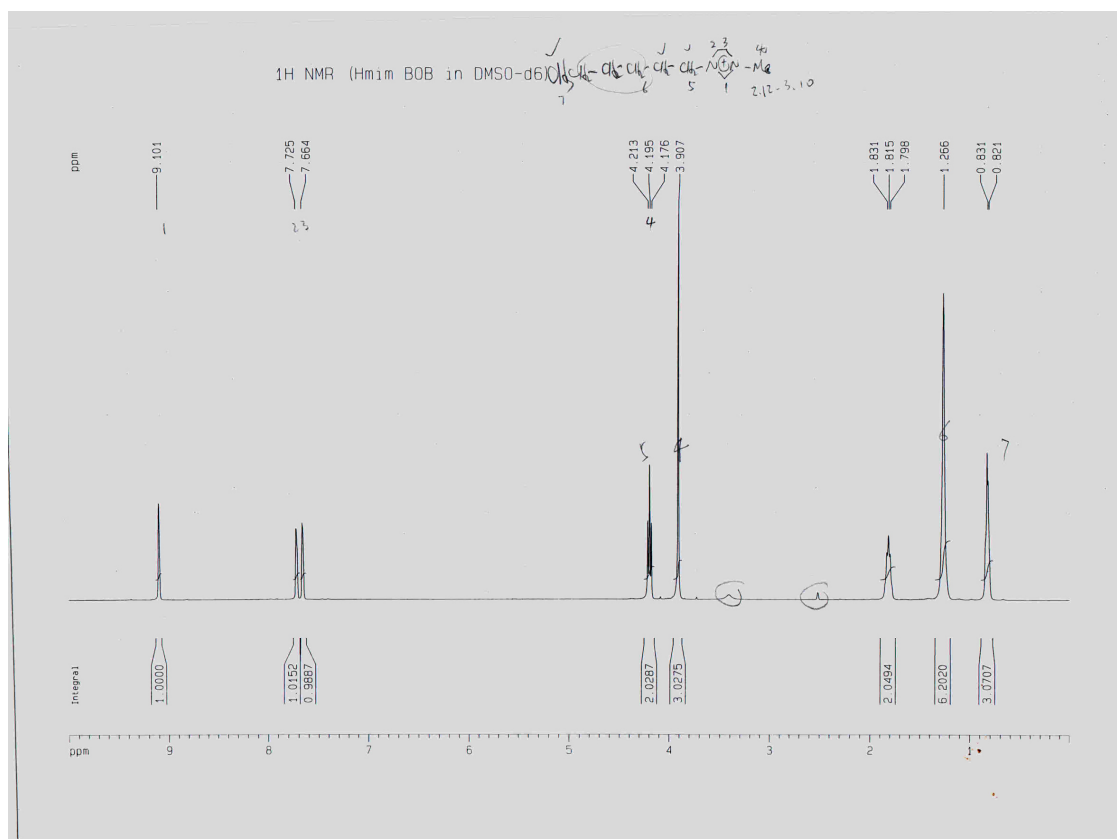

Fig. S4  $^1\text{H NMR}$  of [Hmim][BOB]

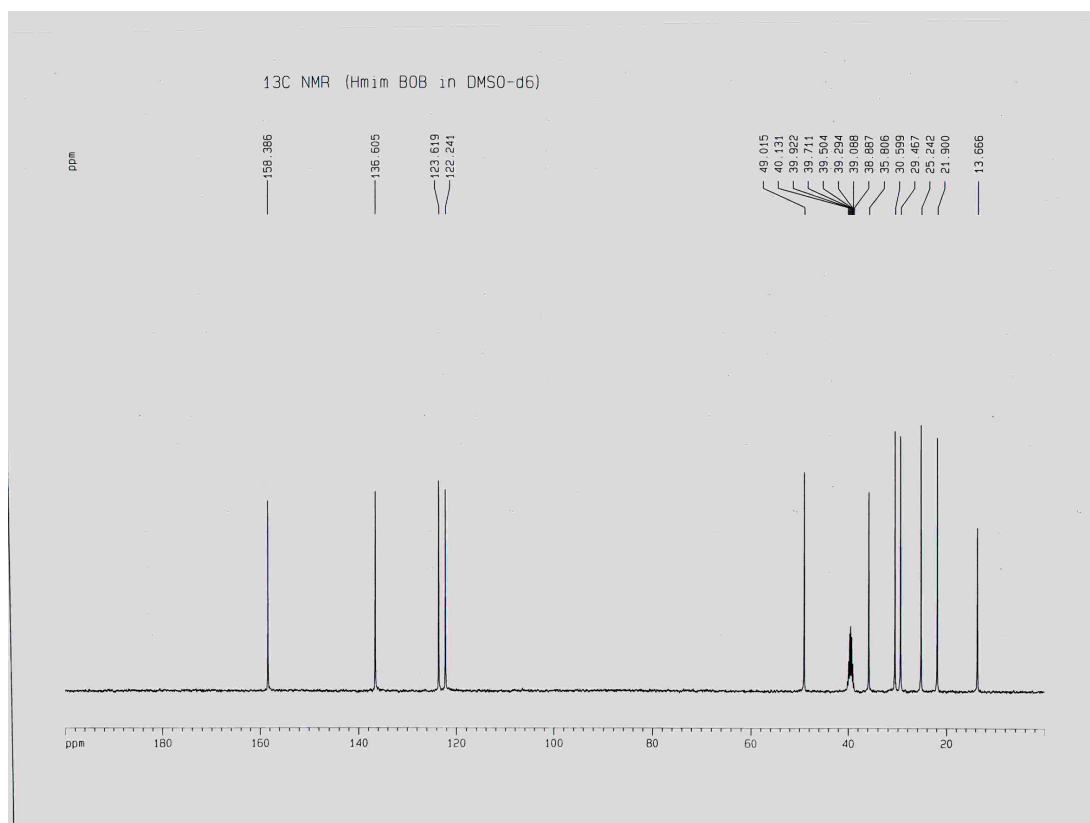

Fig. S5  $^{13}\text{C}$  NMR of [Hmim][BOB]

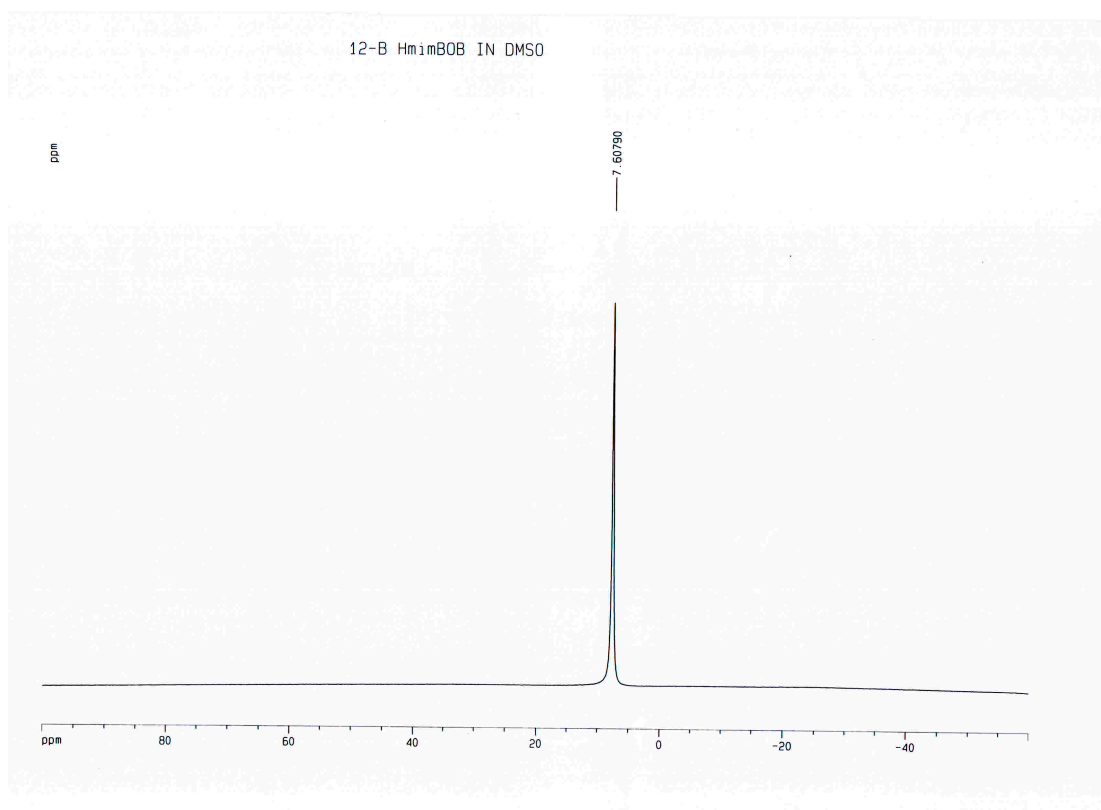

Fig. S6  $^{11}\text{B}$  NMR of [Hmim][BOB]

The TG measurements were carried out by using a Netzsch differential scanning calorimeter (model: STA449F3). The experimental curves, as seen in Figure S7 and S8, show that the decomposition temperature of [Bmim][BOB] is around 259 °C and that of [Hmim][BOB] is 235 °C.

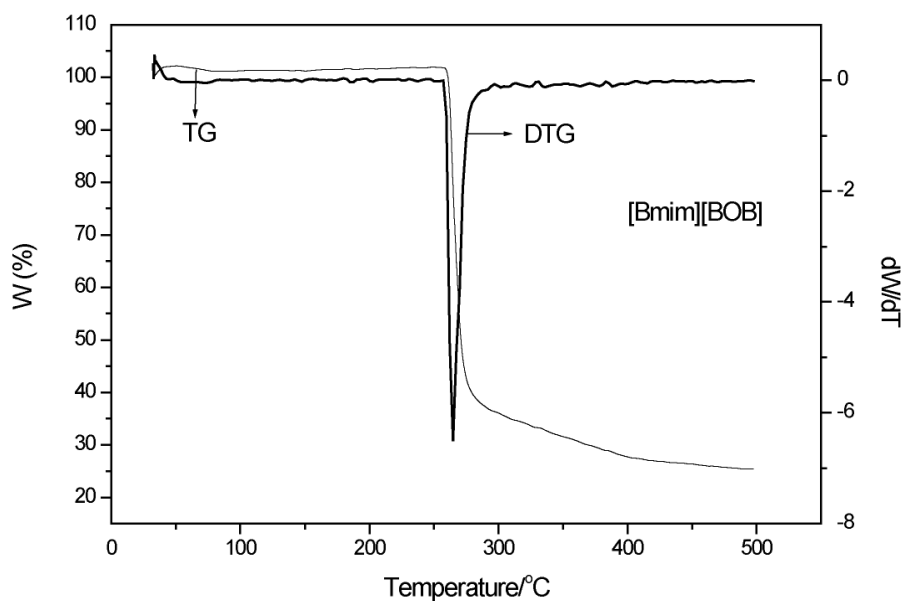

Fig. S7 TG and DTG curves of [Bmim][BOB]

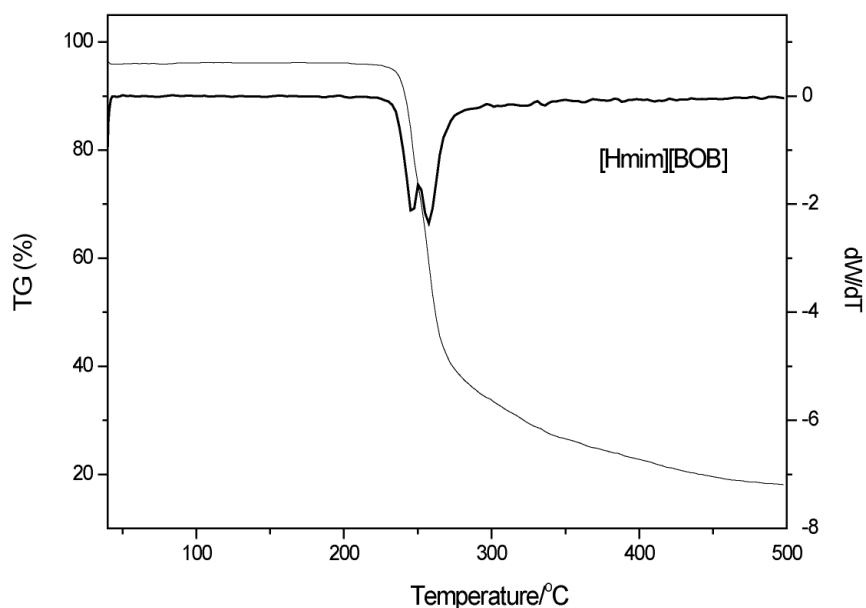

Fig. S8 TG and DTG curves of [Hmim][BOB]
